# THE AMERICAN JOURNAL OF PSYCHIATRY

---

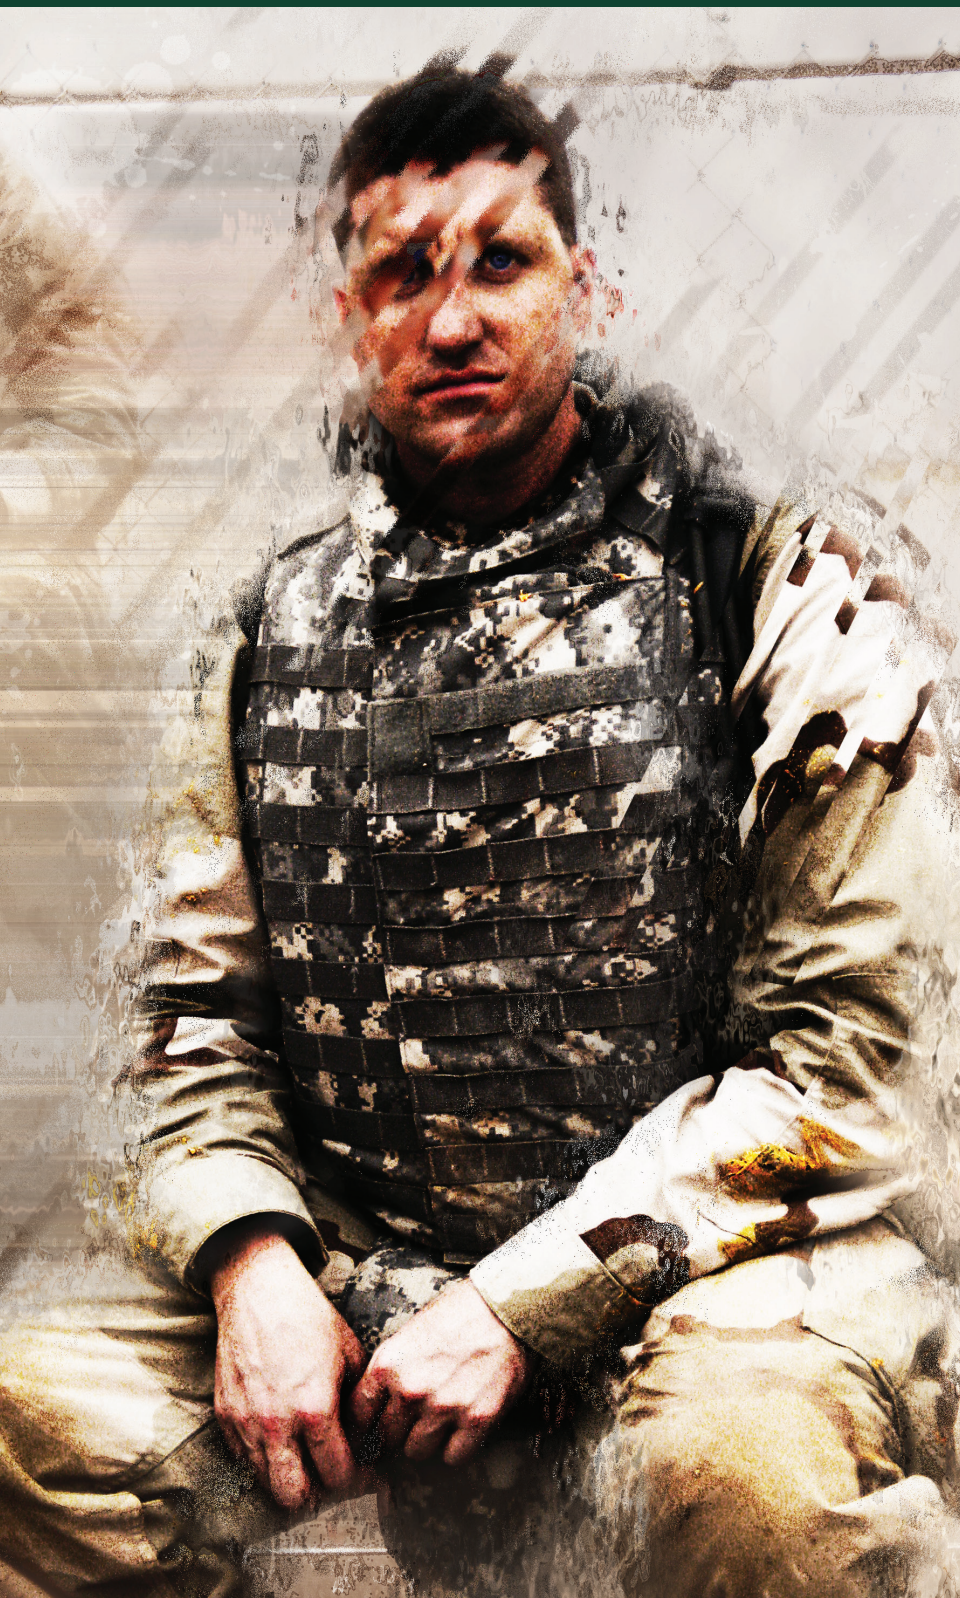

◀ Effectiveness of Mental Health Screening and Coordination of In-Theater Care Prior to Deployment to Iraq: A Cohort Study  
Christopher H. Warner, M.D., et al. 378

Longitudinal Follow-Up of Bipolar Disorder in Women With Premenstrual Exacerbation: Findings From STEP-BD  
Rodrigo S. Dias, M.D., Ph.D., et al. 386

Effect of Nicotine Replacement Therapy on Agitation in Smokers With Schizophrenia: A Double-Blind, Randomized, Placebo-Controlled Study  
Michael H. Allen, M.D., et al. 395

Evaluation of Functionally Meaningful Measures for Clinical Trials of Cognition Enhancement in Schizophrenia  
Michael F. Green, Ph.D., et al. 400

Continuing Medical Education 445

**April 2011**

**Volume 168 • Number 4**

---

Official Journal of the  
AMERICAN PSYCHIATRIC ASSOCIATION

---

[ajp.psychiatryonline.org](http://ajp.psychiatryonline.org)
