# The Residents' JOURNAL

**The Residents' JOURNAL** a publication of The American Journal of Psychiatry

March 2011 Volume 6 Issue 3

**Inside**

- 1 In This Issue
- 2 Tobacco Cessation  
Joseph M. Cerimele, M.D.
- 3 Medical Decision-Making Capacity: An Overview  
Nishi Bhopal, M.D.
- 5 Lunar Madness: Does the Full Moon Guarantee a Bad Call Night?  
Dawn Flosnik, M.D.
- 6 Capacity to Make Foolish Decisions  
Patrick Gresham, M.D.
- 7 A Resident's Guide to Tarasoff  
Monifa Seawell, M.D.
- 10 Rapid Treatment of Psychiatric Symptoms in End-of-Life Patients  
Mark Sylvester, M.D.
- 12 Secrets and Lies  
Melani Zupancic, M.D.
- 13 Reducing and Preventing Cannabis Use in High-Risk Patients  
Justine Wittenauer, M.D.  
Arshya Vahabzadeh, M.D.
- 15 Test Your Knowledge
- 16 Residents' Journal Info

**In This Issue**



This issue of *The Residents' Journal* features articles on patient decision-making capacity as well as the resident's on-call experience. First, Nishi Bhopal, M.D., provides information on tools to aid the psychiatry resident in assessing patient capacity. Next, Dawn Flosnik, M.D., discusses both historical and empirical findings regarding an association between lunar phases and psychiatric hospital admissions. Finally, Patrick Gresham, M.D., shares with us a compelling and reflective personal experience involving a patient's capacity to make a life or death decision.

Editor-in-Chief: Joseph M. Cerimele, M.D.  
Associate Editor: Sarah M. Fayad, M.D.  
Editors Emeriti: Sarah B. Johnson, M.D., Molly McVay, M.D.  
Guest Section Editor: Monifa Seawell, M.D.  
Staff Editor: Angela Moore

The Residents' Journal accepts manuscripts authored by medical students, resident physicians, and fellows. To submit your paper, please visit the manuscript submission site at [mc.manuscriptcentral.com/appi-ajp](http://mc.manuscriptcentral.com/appi-ajp) and either create an account or use your existing account. For manuscript type, select "Residents." Then follow the instructions to upload your manuscript. Residents who are interested in participating as Guest Section Editors should e-mail the Residents' Journal Editor-in-Chief Joseph Cerimele at [joseph.cerimele@mssm.edu](mailto:joseph.cerimele@mssm.edu).

See the September 2010 issue for details on the new peer review process.

The Residents' Journal is sent free-of-charge to all psychiatry residents. Anyone interested in being included on the distribution list should contact Angela Moore, the Residents' Journal staff editor at [ajp@psych.org](mailto:ajp@psych.org) with "Subscribe to Residents' Journal" in the subject line.

**Upcoming Issue Themes**  
April: Psychosomatic Medicine  
May: Child Psychiatry

To access the complete Residents' Journal archives, visit [ajp.psychiatryonline.org/misc/Residents\\_Journal.dtl](http://ajp.psychiatryonline.org/misc/Residents_Journal.dtl)

# get CME from AJP

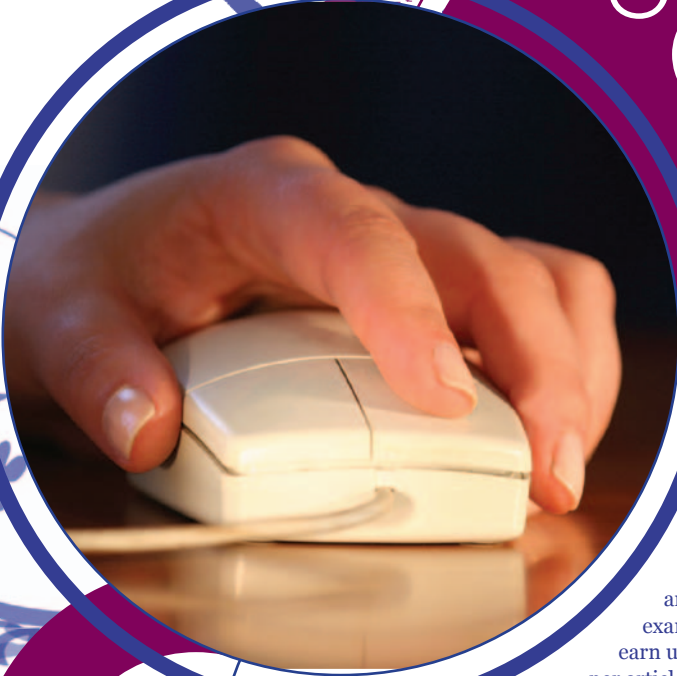

Brief companion exams are created for three of the most influential articles from each issue. By reading the articles and completing the online exams, you can test your knowledge and earn up to 1 *AMA PRA Category 1 Credit*<sup>™</sup> per article. Correct answers are highlighted for your reference upon completion of the course; there is no minimum threshold score necessary for the credit. A

link from the question to the correct answer in context will also be highlighted in the associated article, thus extending the learning experience.

CME credit is only provided online, and a subscription to the AJP CME program is required. From the moment you subscribe to the AJP CME program, you will be able to select from 72 courses from among 40 possible subject areas. You'll also be able to access the next 33 courses as they become available. For more information and pricing, please go to <http://cme.psychiatryonline.org/misc/aboutajpcme.shtml>

This activity is sponsored by the American Psychiatric Association. The American Psychiatric Association is accredited by the Accreditation Council for Continuing Medical Education to provide continuing medical education for physicians. The American Psychiatric Association designates each educational activity for a maximum of 1 *AMA PRA Category 1 Credit*<sup>™</sup>. Physicians should only claim credit commensurate with the extent of their participation in the activity.

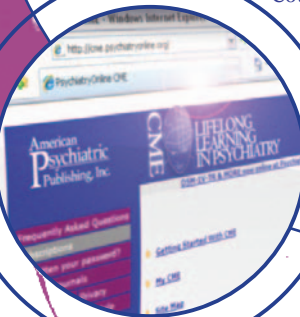

Fulfill your CME requirement while staying current on the latest advances in psychiatry.  
Subscribe to AJP CME!

# THE AMERICAN PSYCHIATRIC ASSOCIATION

1000 Wilson Blvd., Suite 1825, Arlington, VA 22209-3901  
(888) 357-7924 (toll-free inside the U.S. and Canada) / (703) 907-7300  
web site: [www.psych.org/](http://www.psych.org/) e-mail: [apa@psych.org](mailto:apa@psych.org)

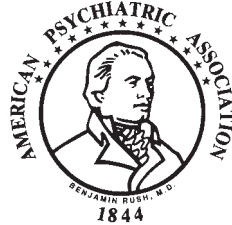

## OFFICERS 2010–2011

|                        |                                 |
|------------------------|---------------------------------|
| <b>President</b>       | Carol A. Bernstein, M.D.        |
| <b>President-Elect</b> | John M. Oldham, M.D.            |
| <b>Vice-President</b>  | Jeffrey L. Geller, M.D., M.P.H. |
| <b>Treasurer</b>       | David Fassler, M.D.             |
| <b>Secretary</b>       | Roger Peele, M.D.               |

## ASSEMBLY

|                      |                           |
|----------------------|---------------------------|
| <b>Speaker</b>       | Bruce A. Hershfield, M.D. |
| <b>Speaker-Elect</b> | Ann Marie Sullivan, M.D.  |
| <b>Recorder</b>      | R. Scott Benson, M.D.     |

## MEDICAL DIRECTOR'S OFFICE

|                                 |                            |
|---------------------------------|----------------------------|
| <b>Medical Director and CEO</b> | James H. Scully, Jr., M.D. |
|---------------------------------|----------------------------|

## BOARD OF TRUSTEES

|                            |                                  |
|----------------------------|----------------------------------|
| Brian Crowley, M.D.        | Carolyn B. Robinowitz, M.D.      |
| Mary Helen Davis, M.D.     | Alan F. Schatzberg, M.D.         |
| Mark David Graff, M.D.     | Jacqueline N. Smith, M.D.        |
| Marilyn Griffin, M.D.      | Joyce A. Spurgeon, M.D.          |
| Dilip V. Jeste, M.D.       | Frederick J. Stoddard, Jr., M.D. |
| Sarah Johnson, M.D., M.Sc. | Nada L. Stotland, M.D., M.P.H.   |
| Steve Hyun Koh, M.D.       | John J. Wernert III, M.D.        |
| James E. Ninger, M.D.      | William M. Womack, M.D.          |
| Kayla M. Pope, M.D., J.D.  |                                  |

The American Journal of Psychiatry is online at [ajp.psychiatryonline.org](http://ajp.psychiatryonline.org)

THE AMERICAN PSYCHIATRIC ASSOCIATION  
Chairpersons of Councils, Commissions, Committees, and Task Forces

**Standing Committees**

---

**Bylaws**

John O. Gaston, M.D.

**Elections**

Kathleen M. Mogul, M.D.

**Ethics**

Richard D. Milone, M.D.

**Finance and Budget**

Frank W. Brown, M.D.

*Audit*

David Fassler, M.D.

*Investment Oversight*

Larry R. Faulkner, M.D.

**Joint Reference**

John M. Oldham, M.D.

**Membership**

Joseph Ezra V. Rubin, M.D.

**Nominating**

Alan F. Schatzberg, M.D.

**Tellers**

Eliot Sorel, M.D.

**Council on Addiction Psychiatry**

---

John A. Renner, M.D.

**Council on Advocacy and  
Government Relations**

---

Robert Paul Cabaj, M.D.

*Advocacy and Litigation Funding*

Jeffrey L. Metzner, M.D.

**Council on Children, Adolescents,  
and Their Families**

---

Steven Paul Cuffe, M.D.

*Agnes Purcell McGavin Award*

John E. Schowalter, M.D.

*Blanche F. Ittleson Research Award*

Beth Ann Brooks, M.D.

**Council on Communications**

---

Jeffrey A. Borenstein, M.D.

**Council on Healthcare Systems  
and Financing**

---

Anita Smith Everett, M.D.

*Reimbursement for Psychiatric Care*

Joseph T. English, M.D.

*RBRVS, Codes and Reimbursement*

Ronald M. Burd, M.D.

**Council on Medical Education and  
Lifelong Learning**

---

Sandra Sexson, M.D.

*APA Public Psychiatry Fellowship Selection  
Committee*

Jules M. Ranz, M.D.

*APA/SAMHSA Minority Fellowship Selection and  
Advisory*

Maria A. Oquendo, M.D.

*Scientific Program*

Tana Annette Grady-Weliky, M.D.

*Scientific Program Committee of the Institute  
on Psychiatric Services*

Wesley E. Sowers, M.D.

*Task Force to Update the Ethics Annotations*

Laura W. Roberts, M.D.

*Vestermark Award*

Kailie R. Shaw, M.D.

**Council on Minority Health and  
Health Disparities**

---

Sandra C. Walker, M.D.

**Council on Psychiatry And Law**

---

Patricia R. Recupero, M.D., J.D.

*Isaac Ray Award*

Renee L. Binder, M.D.

*Judicial Action*

Paul S. Appelbaum, M.D.

*Manfred S. Guttmacher Award*

Marilyn Price, M.D., C.M.

**Council on Psychosomatic  
Medicine and Geriatric Psychiatry**

---

Robert Paul Roca, M.D.

**Council on Research and Quality  
Care**

---

Jeffrey A. Lieberman, M.D.

*Electronic Health Records*

Laura J. Fochtman, M.D.

*Psychiatric Dimensions of Disasters*

Robert J. Ursano, M.D.

*Research Awards*

Stuart C. Yudofsky, M.D.

*Steering Committee on Practice Guidelines*

Joel Yager, M.D.

*Task Force on DSM-V*

David J. Kupfer, M.D.

*Task Force on Gender Identity Disorder*

William M. Byne, M.D.

# BJPsych

## Contents

- A11 Editorial Board  
A13 Highlights of this issue

### Editorials

- 247 **Clozapine: dangerous orphan or neglected friend?**  
S. Farooq and M. Taylor
- 250 **Circadian rhythms and cognition in schizophrenia**  
K. Wulff and E. Joyce

- 252 **Before the Meeting – psychiatry in pictures**  
Sarvenaz Keyhani

- 253 **The Madrid Declaration: why we need a coordinated Europe-wide effort in mental health research**  
J. L. Ayuso-Mateos, T. Wykes and C. Arango

- 255 **Shakespeare and post-traumatic stress disorder – extra**  
Glin Bennet

### Review article

- 256 **Initiatives to shorten duration of untreated psychosis: systematic review**  
B. Lloyd-Evans, M. Crosby, S. Stockton, S. Pilling, L. Hobbs, M. Hinton and S. Johnson

### Papers

- 264 **Prevalence of autoimmune thyroid dysfunction in postpartum psychosis**  
V. Bergink, S. A. Kushner, V. Pop, H. Kuijpers, M. P. Lambregtse-van den Berg, R. C. Drexhage, W. Wiersinga, W. A. Nolen and H. A. Drexhage

- 268 **Happiness – poems by doctors**  
Aarohee B. Desai

- 269 **Sleep-wake cycles and cognitive functioning in schizophrenia**  
V. Bromundt, M. Köster, A. Georgiev-Kill, K. Opwis, A. Wirz-Justice, G. Stoppe and C. Cajochen

- 277 **Time course of regional brain activity accompanying auditory verbal hallucinations in schizophrenia**  
R. E. Hoffman, B. Pittman, R. T. Constable, Z. Bhagwagar and M. Hampson

- 284 **Polygenic dissection of the bipolar phenotype**  
M. L. Hamshere, M. C. O'Donovan, I. R. Jones, L. Jones, G. Kirov, E. K. Green, V. Moskvina, D. Grozeva, N. Bass, A. McQuillin, H. Gurling, D. St Clair, A. H. Young, I. N. Ferrier, A. Farmer, P. McGuffin, P. Sklar, S. Purcell, P. A. Holmans, M. J. Owen and N. Craddock

- 289 **Epilepsy in autism: features and correlates**  
P. F. Bolton, I. Carcani-Rathwell, J. Hutton, S. Goode, P. Howlin and M. Rutter

- 295 **Childhood eating disorders: British national surveillance study**  
D. E. Nicholls, R. Lynn and R. M. Viner

- 301 **Invasion of the Body Snatchers – psychiatry in the movies**  
Trevor Turner

- 302 **State-dependent alteration in face emotion recognition in depression**  
I. M. Anderson, C. Shippen, G. Juhasz, D. Chase, E. Thomas, D. Downey, Z. G. Toth, K. Lloyd-Williams, R. Elliott and J. F. W. Deakin

- 309 **Postcards in Persia: randomised controlled trial to reduce suicidal behaviours 12 months after hospital-treated self-poisoning**  
H. Hassanian-Moghaddam, S. Sarjami, A.-A. Kolahi and G. L. Carter

- 317 **Lack of perceived social support among immigrants after a disaster: comparative study**  
A. N. Drogendijk, P. G. van der Velden, B. P. R. Gersons and R. J. Kleber

### Columns

- 323 Correspondence  
327 Corrections  
328 Book reviews  
330 Contents of *Advances in Psychiatric Treatment*  
331 Contents of the *American Journal of Psychiatry*  
332 From the Editor's desk

### Cover picture

Geno Pheno Sculpture:  
*Fractal Dice* No. 1 (2005)  
Keith Tyson (b. 1969)

Keith Tyson, born in Lancashire, England, is a Turner Prize-winning painter and sculptor. He had a traumatic childhood, numerous mental breakdowns and was admitted to a psychiatric unit. Viewing these as childhood existential traumas, he says that questions about the meaning of human existence inspire his creations, many of which also incorporate philosophical themes, scientific concepts and mathematical formulae. *Fractal Dice*, first exhibited in 2008, are sculptures of dice that are morphed into different shapes. Underpinning this work is a mathematical system called the random iterative function, which dictated by the rolls of the die and, applied three-dimensionally, determined the individual sculpture's size, colour, angle and extrusion. According to Keith, *Fractal Dice* was inspired by gambling but was not the result of his own addiction. He says, 'In the past I have become addicted to gambling as a diversion defense when the stress of life becomes overwhelming. I spent years losing. I had the Dostoevsky disease, where I couldn't stop. It's your life in a spin'. Keith Tyson is an artist in residence in the astrophysics and cosmology department at the University of Oxford. He has exhibited widely across Europe, America, North America and the Far East.

Text by Sanju George, a Birmingham-based addiction psychiatrist with a special interest in gambling addiction.

Reproduced courtesy of Keith Tyson; photography by Gordon R. Christmas c/o PaceWildenstein NYC.

We are always looking for interesting and visually appealing images for the cover of the *Journal* and would welcome suggestions or pictures, which should be sent to Dr Allan Beveridge, British Journal of Psychiatry, 17 Belgrave Square, London SW1X 8PG, UK or [bjp@cpsych.ac.uk](mailto:bjp@cpsych.ac.uk).

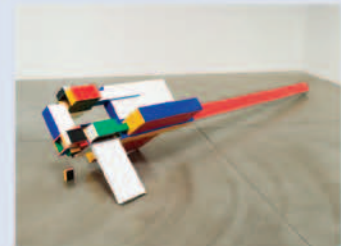

# READ The American Journal of PSYCHIATRY ONLINE

## ONLINE BENEFITS

### AJP in Advance

Receive key research articles posted on the AJP website well in advance of their appearance in print.

### Back Issue Access

Gain access to back issues starting with Volume 1, Issue 1 of the American Journal of Insanity in 1844. (Available to institutions as a separate one-time purchase.)

### AJP CME

Take interactive quizzes that offer AMA PRA Category 1 Credits™ for selected articles from each issue (with paid subscription to the CME Course Program).

### AJP Audio

Listen to MP3-format program summarizing findings from key articles from each issue.

### Residents' Journal

Read additional AJP articles and features that have most value to residents in their training.

### Powerful Searching

Search by author, keyword, and/or citation details—within any one journal, across the entire PsychiatryOnline journal collection, or across all HighWire journals.

### PubMed, CrossRef, and Google Scholar links

Explore everything from cited references to abstracts and full text; to similar articles; to other articles by the same lead authors.

### eTOCs

Get advanced email alerts with the table of contents of the latest issue.

ACTIVATE NOW!

IT'S AS EASY AS...

2 Under SUBSCRIBE NOW, click "Activate Your Online Access"

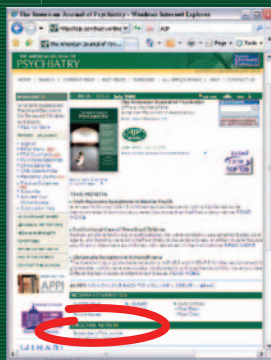

1 Go to [ajp.psychiatryonline.org](http://ajp.psychiatryonline.org)

3 Enter your APA Member Number. (This can be found on your mailing label.)

AJP 3000056866 CAR-RT LOT88 C-105  
John Q Sample  
Mental Health Professional  
1000 Wilson Blvd STE 1825  
Arlington VA 22209-3924 01654

\*In most cases the number on your label will be your Member Number; if it is not, enter your APA Member Number (with enough leading zeros to create 10 digits).

For more information or if you cannot locate your customer number, please contact APPI Customer Service:

1.800.368.5777  
APPI@PSYCH.ORG

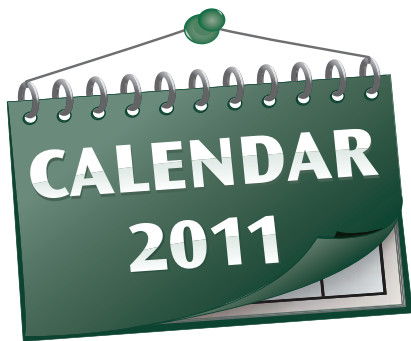

*For free listing of your organization's official annual or regional meeting, please send us the following information: sponsor, location, inclusive dates, type and number of continuing education credits (if available), and the name, address, and telephone number of the person or group to contact for more information. In order for an event to appear in our listing, all notices and changes must be received at least 6 months in advance of the meeting and should be addressed to:*

*Calendar, American Journal of Psychiatry, 1000 Wilson Boulevard, Suite 1825, Arlington, VA 22209-3901, [swestate@psych.org](mailto:swestate@psych.org) (e-mail).*

*Because of space limitations, only listings of meetings of the greatest interest to Journal readers will be included.*

---

## MAY

**May 12–14**, 55th Annual Meeting of the American Academy of Psychoanalysis and Dynamic Psychiatry. Contact: AAPDP Executive Office, P.O. Box 30, Bloomfield, CT 06002; (888) 691-8281 (tel), (860) 286-0787 (fax), [info@aapdp.org](mailto:info@aapdp.org) (e-mail), [www.aapdp.org](http://www.aapdp.org) (web site).

**May 14–19**, 164th Annual Meeting of the American Psychiatric Association, Honolulu, HI. Contact: Cathy Nash, APA Annual Meetings Dept., 1000 Wilson Blvd., Ste. 1825, Arlington, VA 22209; (703) 907-7822.

**May 26–29**, 3rd International Congress on ADHD – From Childhood to Adult Disease, Berlin, Germany. Contact: Congress and Exhibition Office: CPO HANSER SERVICE, 011-49-40-670 88 20 (tel), [www.adhd-congress.org](http://www.adhd-congress.org) (web site), [adhd2011@cpo-hanser.de](mailto:adhd2011@cpo-hanser.de) (e-mail).

---

## OCTOBER

**October 5–8**, II International Congress, Dual Disorders, Addictive Behaviors and other Mental Disorders, Barcelona, Spain. Contact: SEPD, [www.cipd2011.com](http://www.cipd2011.com) (web site).

**October 18–23**, 58th Annual Meeting of the American Academy of Child and Adolescent Psychiatry, Toronto, Ontario. Contact: AACAP, 3615 Wisconsin Avenue, N.W., Washington, DC 20016-3007; (202) 966-7300 (tel), (202) 966-2891 (fax), [meetings@aacap.org](mailto:meetings@aacap.org) (e-mail), [www.aacap.org](http://www.aacap.org) (web site).

**October 27–30**, 63rd Institute on Psychiatric Services, American Psychiatric Association, San Francisco, CA. Contact: Jill Gruber, APA Annual Meetings Dept., 1000 Wilson Blvd., Ste. 1825, Arlington, VA 22209; (703) 907-7815.

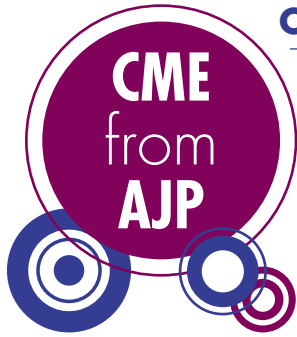

## Continuing Medical Education

Three articles in this issue form the basis of a short course with questions that can be answered for up to 1 *AMA PRA Category 1 Credit™* each by visiting <http://cme.psychiatryonline.org/> and clicking on "American Journal of Psychiatry CME."

CME credit is issued only online, and a paid subscription to the AJP CME course program is required.

This month's courses appear on pages 445–448

**FREE AUDIO!**

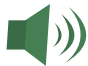

## Have You Heard?

You can listen to highlights of *The American Journal of Psychiatry* by downloading a monthly free .mp3 audio file from our web site (<http://ajp.psychiatryonline.org/misc/audio.dtl>) or by subscribing to the AJP Audio podcast at iTunes or other feed reader (e.g., NewzCrawler, FeedDemon, Bloglines, Google Reader). Presented by Deputy Editor Dr. Susan Schultz or by Editorial Director Michael Roy, each month's audio lasts approximately 30 minutes and covers several research articles, the Treatment in Psychiatry feature, and one or two editorials.

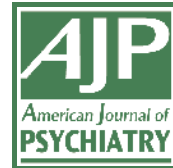

Coming in the May 2011 issue\*

## THE AMERICAN JOURNAL OF PSYCHIATRY

The Impact of National Health Care Reform on Adults With Severe Mental Disorders

R.L. Garfield, S.H. Zuvekas, J.R. Lave, and J.M. Donohue

Clinical and Psychosocial Predictors of Suicide Attempts and Nonsuicidal Self-Injury in the Adolescent Depression Antidepressants and Psychotherapy Trial (ADAPT)

P. Wilkinson, R. Kelvin, C. Roberts, B. Dubicka, and I. Goodyer

Deep Brain Stimulation for Treatment-Resistant Depression: Follow-Up After 3 to 6 Years

S.H. Kennedy, P. Giacobbe, S.J. Rizvi, F.M. Placenza, Y. Nishikawa, H.S. Mayberg, and A.M. Lozano

Association of Schizophrenia in 22q11.2 Deletion Syndrome and Gray Matter Volumetric Deficits in the Superior Temporal Gyrus

E.W.C. Chow, A. Ho, C. Wei, E.H.J. Voormolen, A.P. Crawley, and A.S. Bassett

**\*Can't wait? Visit [ajp.psychiatryonline.org](http://ajp.psychiatryonline.org) and click the "AJP in Advance" logo to see all articles uploaded in advance of print!**
